# Supplementary material
Source: PubMed Central journal article supplement (PMC3740840)
Supplement: 1304459110_pnas.201304459SI.pdf [file 1304459110_pnas.201304459SI.pdf]

# Supporting Information

King and Janik 10.1073/pnas.1304459110

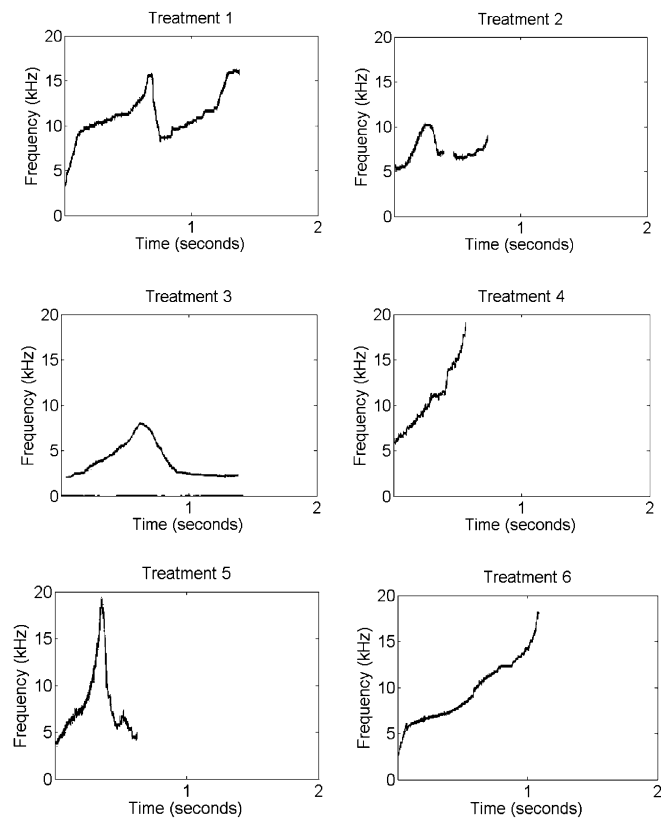

Fig. S1. (Continued)

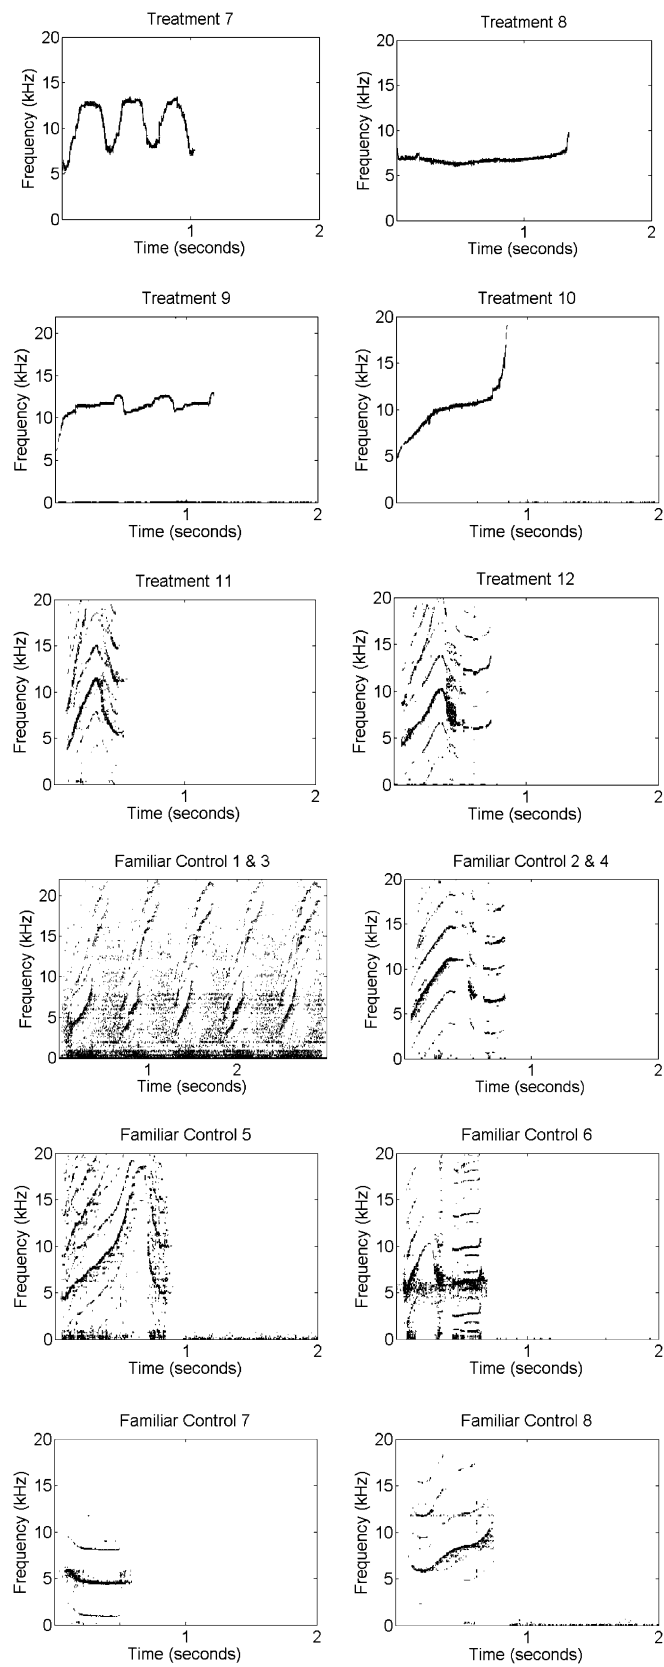

Fig. S1. (Continued)

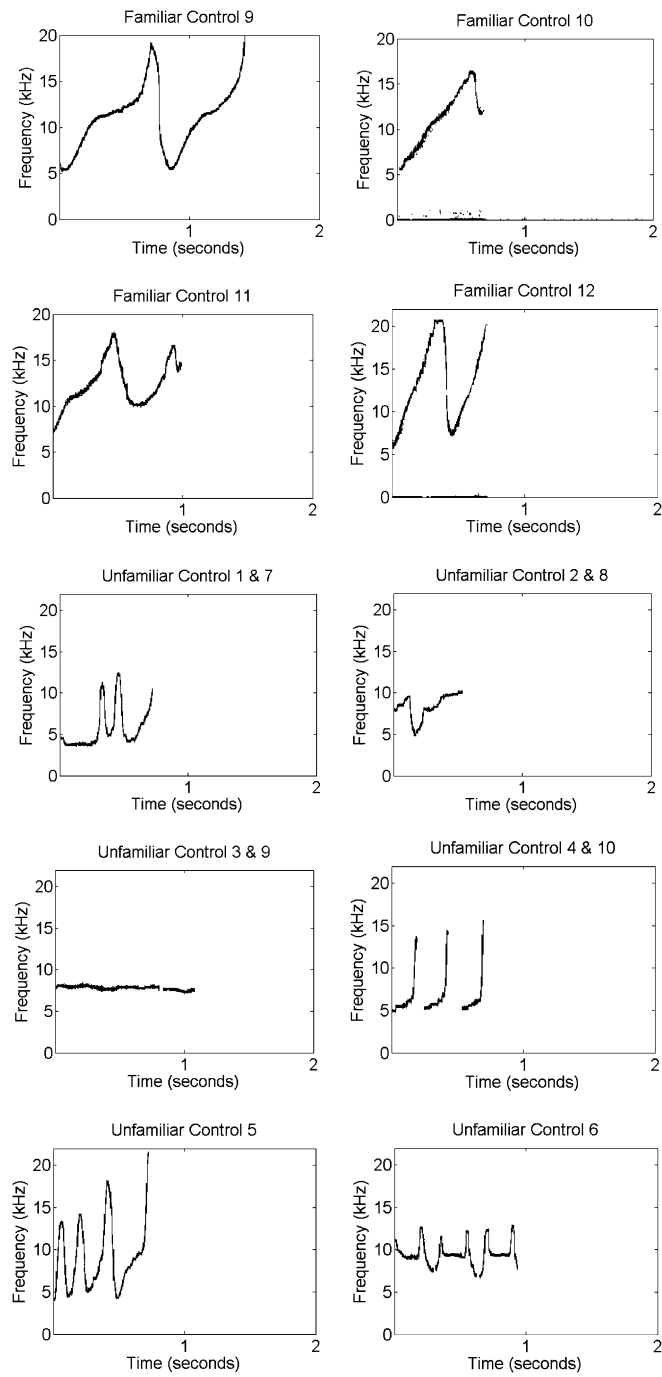

**Fig. S1.** Spectrograms of whistle stimuli used in playback experiments. The title of each panel refers to the playbacks described in Table 1 and in the main text.
